# Supplementary material for: Crosstalk between BRCA-Fanconi anemia and mismatch repair pathways prevents MSH2-dependent aberrant DNA damage responses
Source: PubMed Central journal article supplement (PMC4194102; doi:10.15252/embj.201387530), 2014-06-26
Supplement: embj0033-1698-sd2.pdf [file embj0033-1698-sd2.pdf]

A

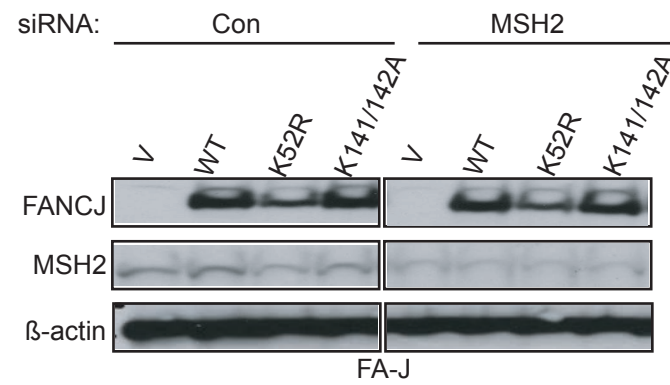

B

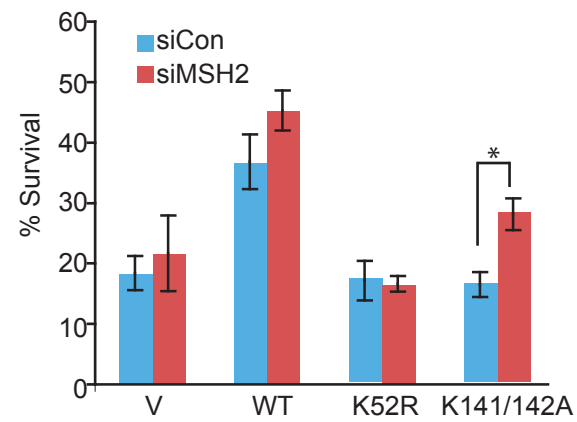

**Supplementary Figure S2. MSH2 does not suppress MMC sensitivity in FA-J cells with inactive helicase FANCD1.** (A) Immunoblot analysis of FANCD1 and MSH2 expression in the FA-J stable cell lines treated with indicated siRNAs. (B) Graph shows the percentage of viable cells 5 days after MMC. Where shown, error bars represent standard deviations from three independent experiments. The asterisk (\*) represents a p-value < 0.01.
