# Supplementary material for: Crosstalk between BRCA-Fanconi anemia and mismatch repair pathways prevents MSH2-dependent aberrant DNA damage responses
Source: PubMed Central journal article supplement (PMC4194102; doi:10.15252/embj.201387530), 2014-06-26
Supplement: embj0033-1698-sd3.pdf [file embj0033-1698-sd3.pdf]

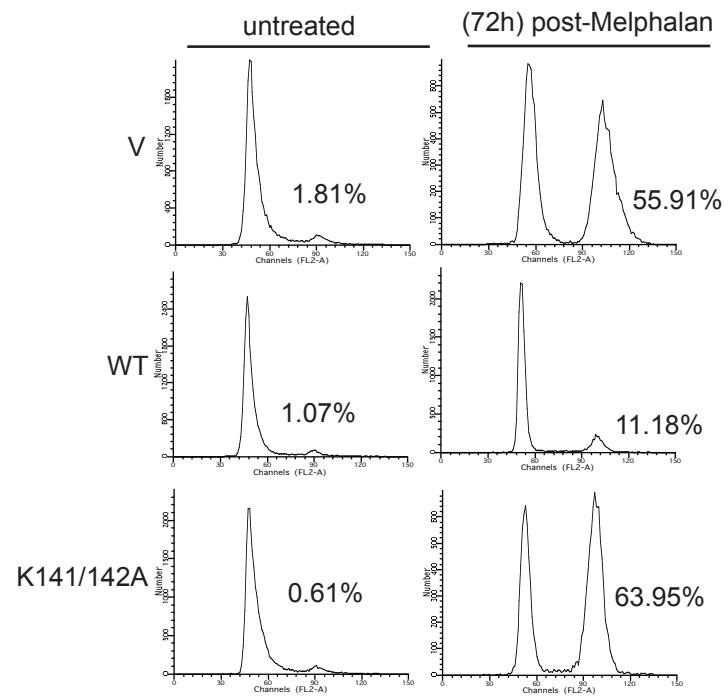

**Supplementary Figure S3. FA-J cells complemented with FANCK141/142A have an abnormal G2/M accumulation.** The G2/M checkpoint in response to melphalan is shown in the distinct FA-J cell lines as the percent cells with 4N DNA content.
