# Supplementary material for: Crosstalk between BRCA-Fanconi anemia and mismatch repair pathways prevents MSH2-dependent aberrant DNA damage responses
Source: PubMed Central journal article supplement (PMC4194102; doi:10.15252/embj.201387530), 2014-06-26
Supplement: embj0033-1698-sd4.pdf [file embj0033-1698-sd4.pdf]

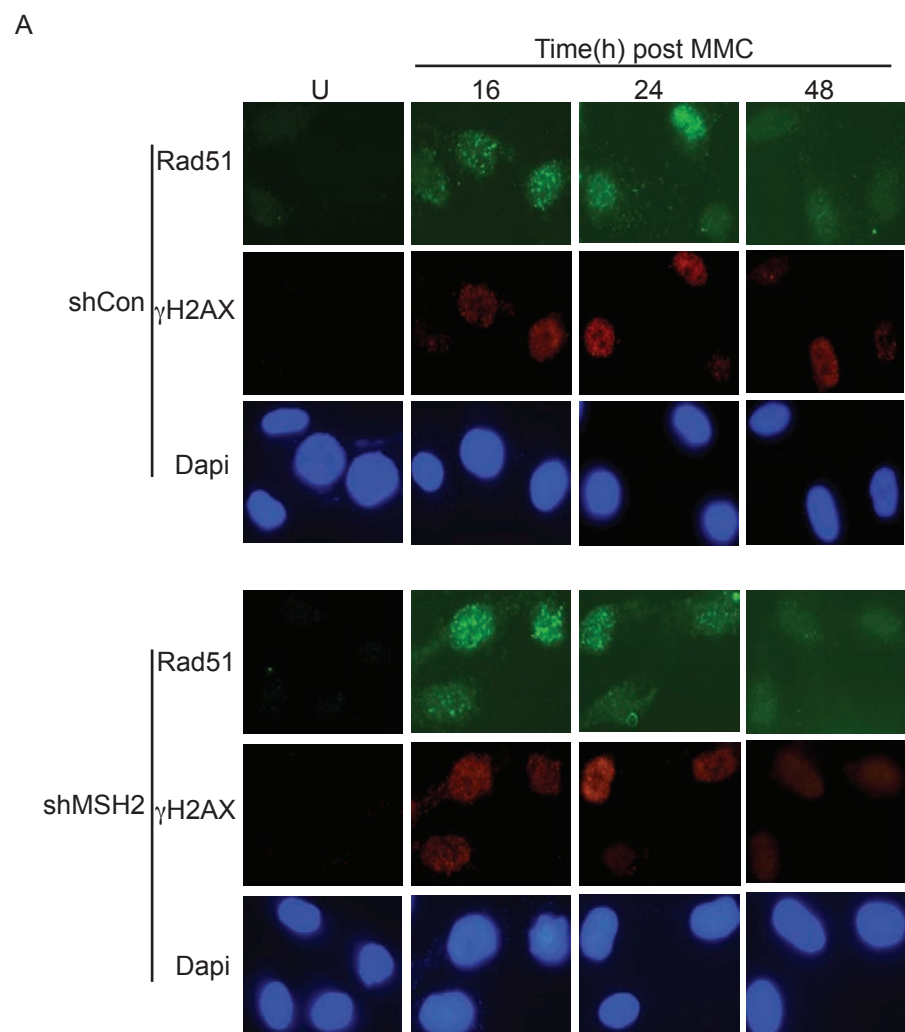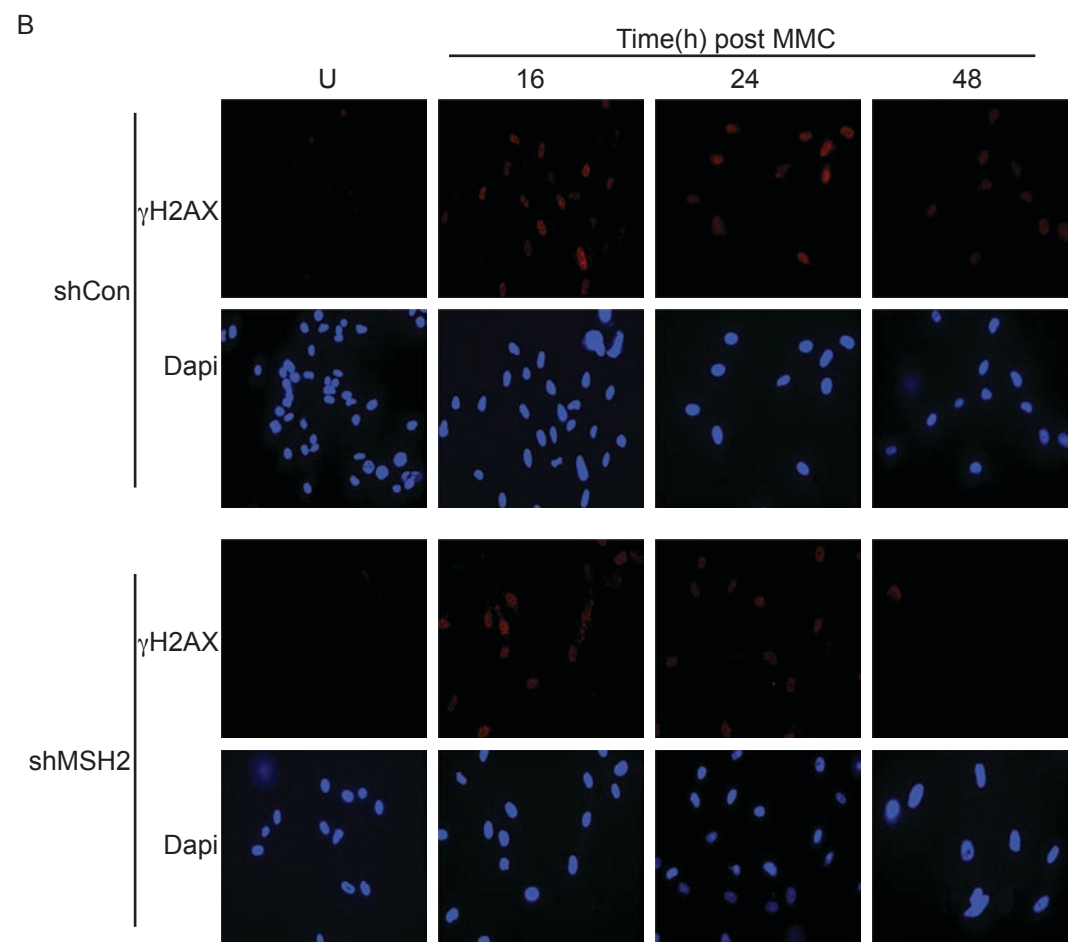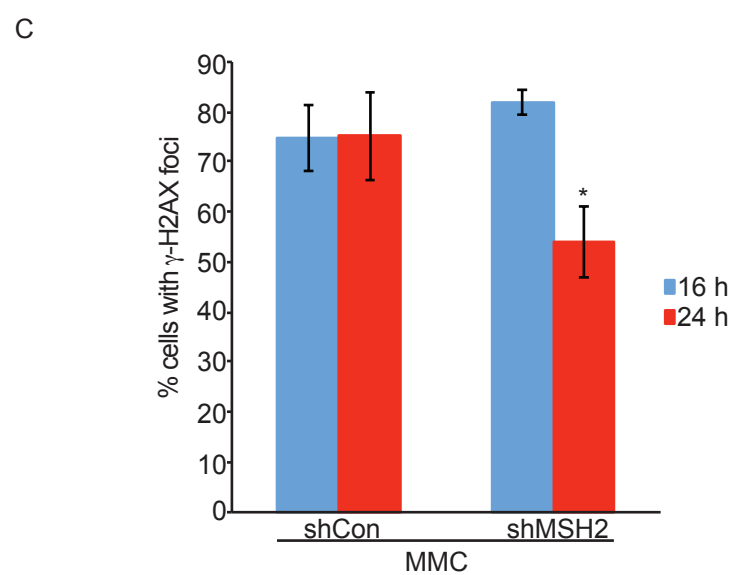

**Supplementary Figure S4. MSH2 depletion does not enhance RAD51 foci, but modestly suppresses MMC induced  $\gamma$ -H2AX.** Representative immunofluorescence images of FANCD1/42A FA-J cells stably expressing shRNA vectors to control or MSH2 at the indicated time post-250nM MMC or left untreated that were either (A) selected based on positive  $\gamma$ -H2AX stain, (B) randomly selected and (C) quantitated. The asterisk (\*) represents a p-value < 0.01.
