# Supplementary material for: Crosstalk between BRCA-Fanconi anemia and mismatch repair pathways prevents MSH2-dependent aberrant DNA damage responses
Source: PubMed Central journal article supplement (PMC4194102; doi:10.15252/embj.201387530), 2014-06-26
Supplement: embj0033-1698-sd6.pdf [file embj0033-1698-sd6.pdf]

A

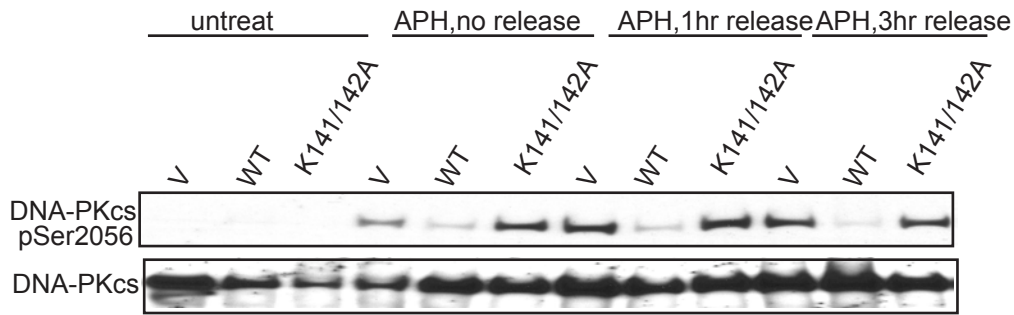

B

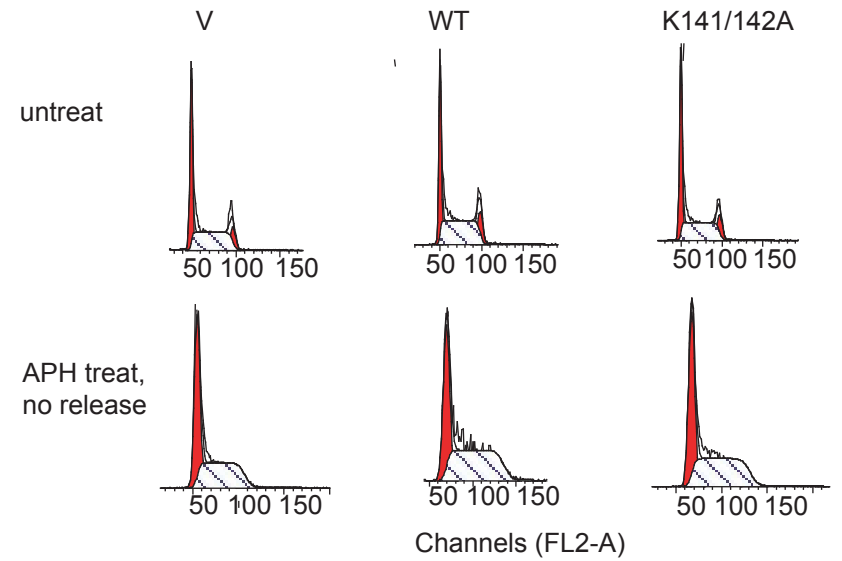

C

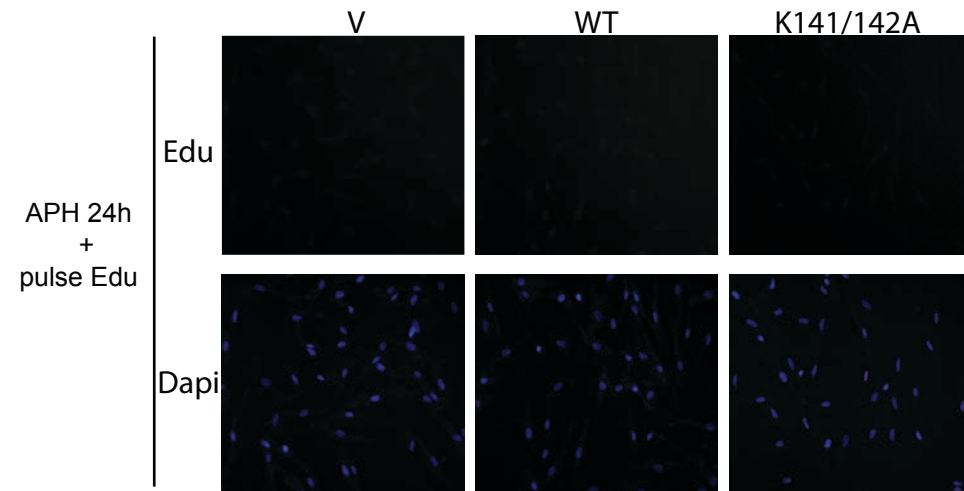

**Supplementary Figure S6. FA-J cells lacking wild-type FANCD1 have a pronounced activation of DNA-PKcs, but have a similar cell cycle and arrest following aphidicolin treatment as wild-type.** (A) Immunoblot analysis of phosphorylation of DNA-PKcs in the FA-J cell lines before or after aphidicolin (APH) treatment and release. (B) FACS analysis shows that FA-J cell lines have a similar cell cycle profile after aphidicolin treatment. (C) Edu pulse and immunofluorescence shows that APH (3ug/ml) treatment similarly blocks replication in FA-J cell lines.
